# Supplementary material for: Selective colonization mechanism of Shewanella putrefaciens in dyeing wastewater outlets
Source: Royal Society of Chemistry journal article supplement (doi:10.1039/c6ra18576b), 2016-01-01
Supplement: c6ra18576b1.pdf [file c6ra18576b1.pdf]

# Selective colonization mechanism of *Shewanella putrefaciens* in dyeing wastewater outlet

Jiajie Xu,<sup>a,b</sup> Weina He,<sup>a</sup> Yanyan Li,<sup>a,c</sup> DiJun Zhang,<sup>a</sup> Jun Zhou,<sup>a</sup> Chundan Zhang,<sup>a</sup> Yi Li,<sup>a</sup> Rixin Wang<sup>a</sup>  
and Xiurong Su<sup>a\*</sup>

<sup>a</sup>. School of Marine Science, Ningbo University, Zhejiang, 315211, China

<sup>b</sup>. College of Engineering, China Agricultural University, Beijing, 100083, China

<sup>c</sup>. Department of Food Science, Cornell University, Ithaca, NY 14853, USA

Correspondence to: [suxiurong@nbu.edu.cn](mailto:suxiurong@nbu.edu.cn)

## Supplementary Information:

Tables S1-S2

Figures S1-S6

Table S1 The compositions of the waste water in Xiangshan Junxi sewage outlet

|       | TS (g L <sup>-1</sup> )<br>(n=6) | Ammonia (mg L <sup>-1</sup> )<br>(n=6) | TCOD (mg L <sup>-1</sup> )<br>(n=6) | BOD (mg L <sup>-1</sup> )<br>(n=6) | pH<br>(n=6) |
|-------|----------------------------------|----------------------------------------|-------------------------------------|------------------------------------|-------------|
| Wast  |                                  |                                        |                                     |                                    |             |
| e     | 4.49±0.05                        | 38.59±5.66                             | 1376.93±157.2                       | 217.13±4.6                         | 8.1±0.45    |
| water |                                  |                                        |                                     |                                    |             |



Table S2 List of spots/proteins identified by MS analysis from *Shewanella putrefaciens* by 2-DE

| Spot number | ncbi accession number | name of protein                                                                | Functional category                                                                                                                                                       | Theoretical MW(kDa)/PI | Mascot score/ Matched peptides | Threshold (P<0.05) | Species                        |
|-------------|-----------------------|--------------------------------------------------------------------------------|---------------------------------------------------------------------------------------------------------------------------------------------------------------------------|------------------------|--------------------------------|--------------------|--------------------------------|
| 1           | gi 386312552          | outer membrane porin, Omp35                                                    | NO Foud                                                                                                                                                                   | 37959/4.64             | 602/14                         | 56                 | [ <i>S.putrefaciens</i> 200]   |
| 2           | gi 386313291          | porin                                                                          | NO Foud                                                                                                                                                                   | 45685/4.53             | 174/13                         | 56                 | [ <i>S.putrefaciens</i> 200]   |
| 3           | gi 146293566          | aromatic hydrocarbon degradation membrane protein                              | NO Foud                                                                                                                                                                   | 47545/4.71             | 237/5                          | 56                 | [ <i>S.putrefaciens</i> CN-32] |
| 4           | gi 146292153          | OmpA/MotB domain-containing protein                                            | NO Foud                                                                                                                                                                   | 40022/4.82             | 110/6                          | 56                 | [ <i>S.putrefaciens</i> CN-32] |
| 5           | gi 146292973          | elongation factor P                                                            | NO Foud                                                                                                                                                                   | 20672/4.79             | 164/4                          | 56                 | [ <i>S.putrefaciens</i> CN-32] |
| 6           | gi 146292505          | 3-ketoacyl-ACP reductase                                                       | Metabolic pathways, Fatty acid biosynthesis, Biosynthesis of unsaturated fatty acids, Fatty acid metabolism, Biotin metabolism                                            | 26645/4.72             | 65/4                           | 56                 | [ <i>S.putrefaciens</i> CN-32] |
| 7           | gi 146293364          | 2-oxoglutarate dehydrogenase, E2 subunit, dihydrolipoamide succinyltransferase | Metabolic pathways, Carbon metabolism, Microbial metabolism in diverse environments, Biosynthesis of secondary metabolites, Citrate cycle (TCA cycle), Lysine degradation | 43234/5.34             | 358/8                          | 56                 | [ <i>S.putrefaciens</i> CN-32] |

|    |              |                                            |                                                                                                                                                                                                                                                                        |            |        |    |                                |
|----|--------------|--------------------------------------------|------------------------------------------------------------------------------------------------------------------------------------------------------------------------------------------------------------------------------------------------------------------------|------------|--------|----|--------------------------------|
| 8  | gi 146293363 | succinyl-CoA synthetase subunit beta       | Metabolic pathways, Carbon metabolism, Microbial metabolism in diverse environments, Biosynthesis of secondary metabolites, Citrate cycle (TCA cycle), C5-Branched dibasic acid metabolism, Propanoate metabolism                                                      | 41699/5.32 | 352/16 | 56 | [ <i>S.putrefaciens</i> CN-32] |
| 9  | gi 146293466 | cysteine synthase A                        | Metabolic pathways, Carbon metabolism, Microbial metabolism in diverse environments, Cysteine and methionine metabolism, Biosynthesis of amino acids , Sulfur metabolism                                                                                               | 34498/5.62 | 241/9  | 56 | [ <i>S.putrefaciens</i> CN-32] |
| 10 | gi 146293923 | polynucleotide phosphorylase/polyadenylase | RNA degradation, Pyrimidine metabolism, Purine metabolism                                                                                                                                                                                                              | 75520/5.09 | 274/20 | 56 | [ <i>S.putrefaciens</i> CN-32] |
| 11 | gi 146293339 | phosphoenolpyruvate synthase               | Metabolic pathways, Carbon metabolism, Microbial metabolism in diverse environments, Pyruvate and Methane metabolism                                                                                                                                                   | 86879/4.98 | 315/14 | 56 | [ <i>S.putrefaciens</i> CN-32] |
| 12 | gi 386315234 | aconitate hydratase 2                      | Biosynthesis of secondary metabolites and amino acids, Metabolic pathways, Propanoate metabolism, Glyoxylate and dicarboxylate metabolism, Microbial metabolism in diverse environments, Citrate cycle (TCA cycle), 2-Oxocarboxylic acid metabolism, Carbon metabolism | 94116/5.09 | 270/20 | 56 | [ <i>S.putrefaciens</i> 200]   |
| 13 | gi 146291806 | chaperonin GroEL                           | RNA degradation                                                                                                                                                                                                                                                        | 57170/4.85 | 476/15 | 56 | [ <i>S.putrefaciens</i> CN-32] |
| 14 | gi 146292589 | trigger factor                             | NO Foud                                                                                                                                                                                                                                                                | 47730/4.80 | 231/16 | 56 | [ <i>S.putrefaciens</i> CN-32] |

|    |              |                                 |                                                                                                                                                                                                                                                                                                 |             |        |    |                                |
|----|--------------|---------------------------------|-------------------------------------------------------------------------------------------------------------------------------------------------------------------------------------------------------------------------------------------------------------------------------------------------|-------------|--------|----|--------------------------------|
| 15 | gi 146292616 | TonB-dependent receptor         | NO Foud                                                                                                                                                                                                                                                                                         | 102004/4.55 | 297/11 | 56 | [ <i>S.putrefaciens</i> CN-32] |
| 16 | gi 146293339 | phosphoenolpyruvate synthase    | Metabolic pathways, Carbon metabolism, Microbial metabolism in diverse environments, Pyruvate metabolism, Methane metabolism                                                                                                                                                                    | 86879/4.98  | 85/3   | 56 | [ <i>S.putrefaciens</i> CN-32] |
| 17 | gi 146294855 | elongation factor Tu            | NO Foud                                                                                                                                                                                                                                                                                         | 43547/5.08  | 407/16 | 56 | [ <i>S.putrefaciens</i> CN-32] |
| 18 | gi 146292699 | alkyl hydroperoxide reductase   | NO Foud                                                                                                                                                                                                                                                                                         | 22102/5.01  | 267/7  | 56 | [ <i>S.putrefaciens</i> CN-32] |
| 19 | gi 270381546 | elongation factor Tu            | NO Foud                                                                                                                                                                                                                                                                                         | 28913/4.67  | 333/14 | 56 | [ <i>S.putrefaciens</i> ]      |
| 20 | gi 386314796 | ABC transporter                 | NO Foud                                                                                                                                                                                                                                                                                         | 27193/5.87  | 306/12 | 56 | [ <i>S.putrefaciens</i> 200]   |
| 21 | gi 146295038 | FOF1 ATP synthase subunit alpha | Metabolic pathways, Oxidative phosphorylation                                                                                                                                                                                                                                                   | 55285/5.46  | 398/10 | 56 | [ <i>S.putrefaciens</i> CN-32] |
| 22 | gi 146294500 | dihydrolipoamide dehydrogenase  | Metabolic pathways, Carbon metabolism, Microbial metabolism in diverse environments, Biosynthesis of secondary metabolites, Citrate cycle (TCA cycle) , Pyruvate metabolism, Glycine, serine and threonine metabolism, Valine, leucine and isoleucine degradation, Glycolysis / Gluconeogenesis | 50708/5.56  | 290/8  | 56 | [ <i>S.putrefaciens</i> CN-32] |

---

|    |              |                                                |                                                                                                                                                                                                                                         |             |        |    |                                |
|----|--------------|------------------------------------------------|-----------------------------------------------------------------------------------------------------------------------------------------------------------------------------------------------------------------------------------------|-------------|--------|----|--------------------------------|
| 23 | gi 386312950 | chorismate mutase                              | Biosynthesis of secondary metabolites, Metabolic pathways, Biosynthesis of amino acids, Phenylalanine, tyrosine and tryptophan biosynthesis, Novobiocin biosynthesis                                                                    | 42820/5.57  | 123/8  | 56 | [ <i>S.putrefaciens</i> 200]   |
| 24 | gi 146293334 | Glu/Leu/Phe/Val dehydrogenase                  | Metabolic pathways, Biosynthesis of secondary metabolites, Valine, leucine and isoleucine degradation, Valine, leucine and isoleucine biosynthesis                                                                                      | 37279/ 5.56 | 387/12 | 56 | [ <i>S.putrefaciens</i> CN-32] |
| 25 | gi 146294306 | malate dehydrogenase                           | Metabolic pathways, Carbon metabolism, Microbial metabolism in diverse environments, Biosynthesis of secondary metabolites, Citrate cycle (TCA cycle), Pyruvate metabolism, Methane metabolism, Glyoxylate and dicarboxylate metabolism | 32260/5.37  | 490/10 | 56 | [ <i>S.putrefaciens</i> CN-32] |
| 26 | gi 146294298 | glycine cleavage system aminomethyltransferasT | Metabolic pathways, Carbon metabolism, Glycine, serine and threonine metabolism, One carbon pool by folate                                                                                                                              | 39885/5.19  | 108/7  | 56 | [ <i>S.putrefaciens</i> CN-32] |

---

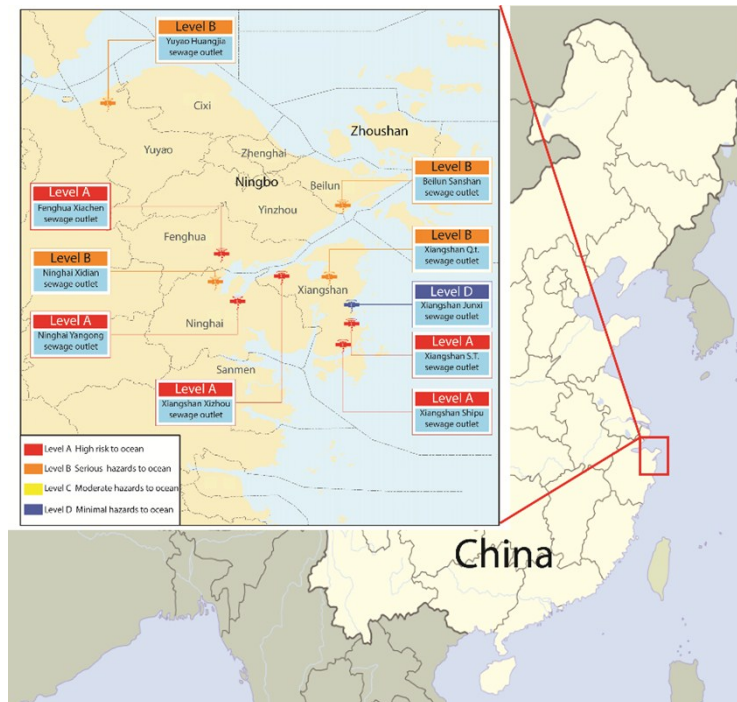

Fig. S1 Map of 10 terrestrial sewage outlets sites in coastal areas of Ningbo

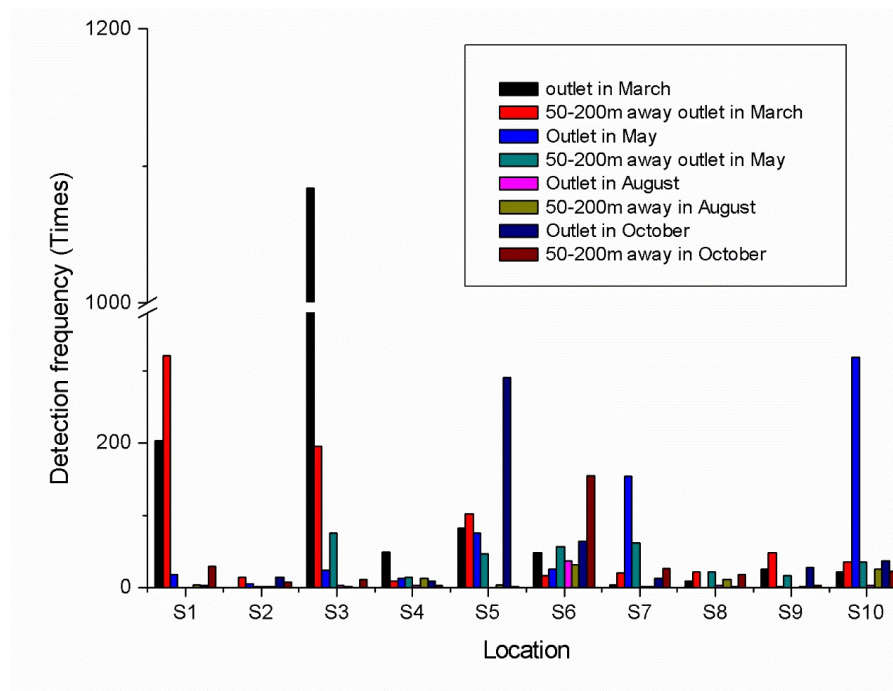

Fig. S2 The detection frequency of *S. putrefaciens* in different 10 terrestrial sewage outlets in coastal areas of Ningbo. S1: Xiangshan Junxi sewage outlet; S2: Xiangshan S.T. sewage outlet; S3: Xiangshan Shipu sewage outlet; S4: Xiangshan Xizhou sewage outlet; S5: Xiangshan Q.T. sewage outlet; S6: Beilun Sanshan sewage outlet; S7: Ninghai Xidian sewage outlet; S8: Fenghua Xiachen sewage outlet; S9: Ninghai Yangong sewage outlet; S10: Yuyao Huangjiang sewage outlet.

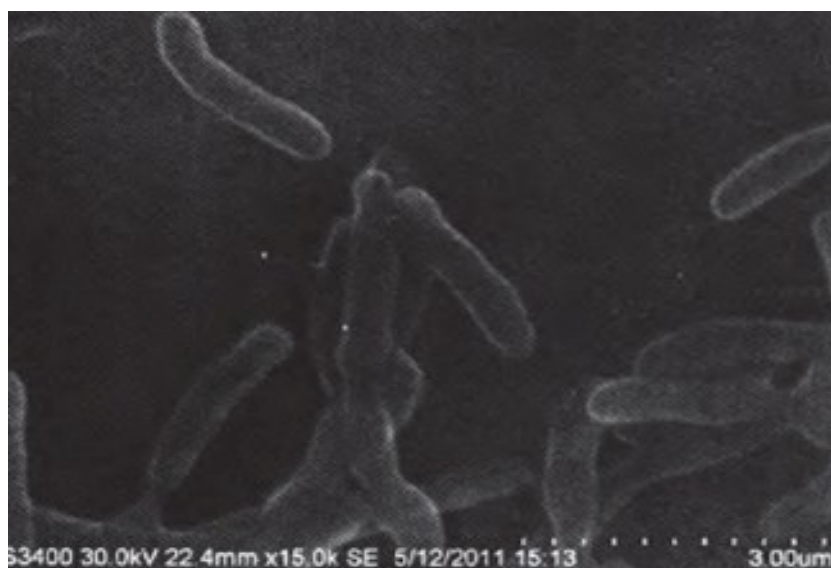

Fig. S3 photomicrograph of isolated *S. putrefaciens*

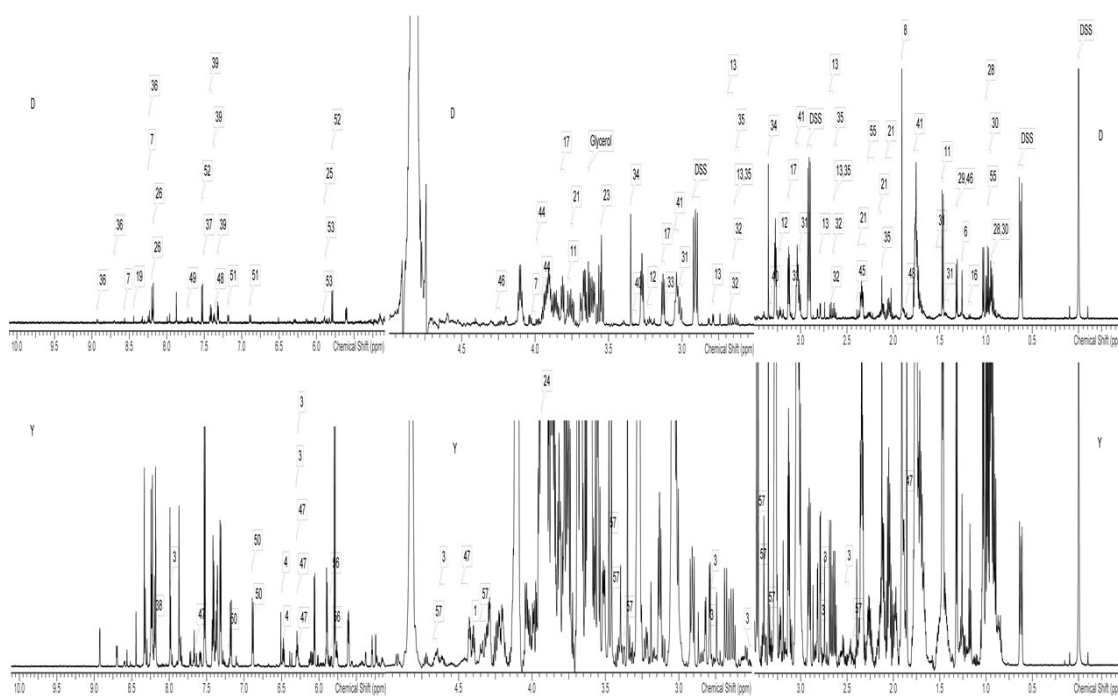

Figure S4. <sup>1</sup>H NMR ownership spectrum of intracellular metabolites from *S. putrefaciens* in fresh water and dyeing wastewater



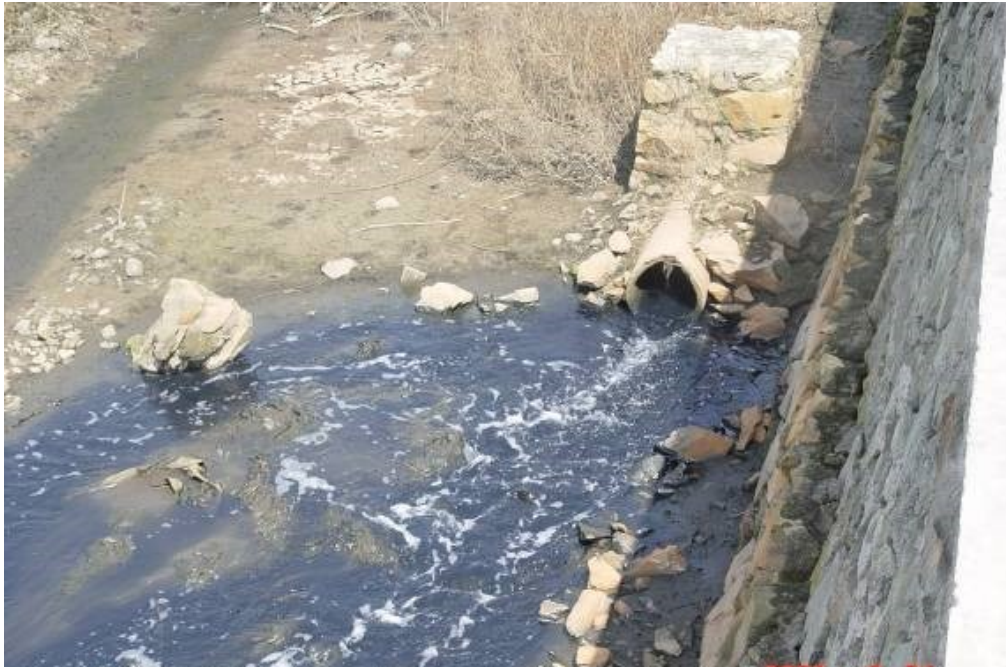

Figure S5 Photographs of dyeing wastewater outlets

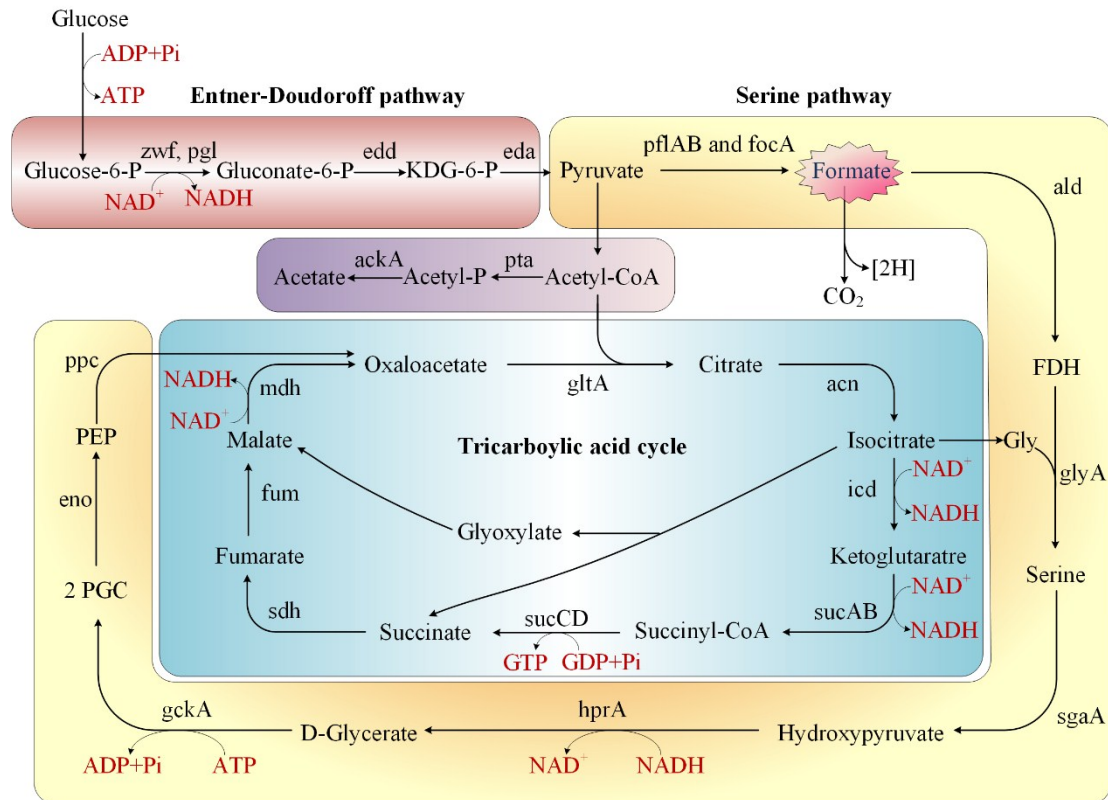

Figure S6 Transcriptional regulatory networks in the carbohydrate mechanisms of *Shewanella* according to KEGG and previous research <sup>1-3</sup>. Genes that encode the enzymes in this schematic are referred to by their commonly used names. KDG-6-P, 2-keto-3-deoxy-6-phosphogluconate; P, phosphate; FDH, Formaldehyde; 2PGC, 2 Phosphoglycerate; Gly, glycine; PEP, phosphoenolpyruvate.

## Reference

1. J. K. Fredrickson, M. F. Romine, A. S. Beliaev, J. M. Auchtung, M. E. Driscoll, T. S. Gardner, K. H. Nealson, A. L. Osterman, G. Pinchuk and J. L. Reed, *Nature Reviews Microbiology*, 2008, **6**, 592-603.
2. J. H. Scott and K. H. Nealson, *J. Bacteriol.*, 1994, **176**, 3408-3411.
3. G. E. Pinchuk, O. V. Geydebrekht, E. A. Hill, J. L. Reed, A. E. Konopka, A. S. Beliaev and J. K. Fredrickson, *Applied and environmental microbiology*, 2011, **77**, 8234-8240.
